# Supplementary material
Source: PubMed Central journal article supplement (PMC4571867)
Supplement: supp_M115.672253_jbc.M115.672253-1.pdf [file supp_M115.672253_jbc.M115.672253-1.pdf]

## SUPPLEMENTAL INFORMATION

A disulfide bond-forming machine is linked to the sortase-mediated pilus assembly pathway in the Gram-positive bacterium *Actinomyces oris*

**Melissa E. Reardon-Robinson,<sup>1</sup> Jerzy Osipiuk,<sup>2,3</sup> Chungyu Chang,<sup>1</sup> Chenggang Wu,<sup>1</sup> Neda Jooya,<sup>1</sup> Andrzej Joachimiak,<sup>2,3</sup> Asis Das,<sup>4</sup> and Hung Ton-That<sup>1†</sup>**

<sup>1</sup>Department of Microbiology & Molecular Genetics, University of Texas Health Science Center, Houston, TX, USA

<sup>2</sup>Midwest Center for Structural Genomics, Department of Biosciences, Argonne National Laboratory, Argonne, IL, USA

<sup>3</sup>Structural Biology Center, Argonne National Laboratory, Department of Biosciences, Argonne, IL, USA

<sup>4</sup>Department of Molecular Biology and Biophysics, University of Connecticut Health Center, Farmington, CT, USA

\*Running title: *Post-translocational folding of Gram-positive pilins*

†To whom correspondence should be addressed: Hung Ton-That, Department of Microbiology and Molecular Genetics, University of Texas Health Science Center, 6431 Fannin Street, R224/MSE, Houston, TX 77030, USA. Tel. (+1) 713 500 5468; Fax (+1) 713 500 5499; E-mail: ton-that.hung@uth.tmc.edu

**Keywords:** Actinomyces; crystallography; disulfide bond formation; coaggregation; pili; sortase; oxidative protein folding; secretion

## Supplemental Data

### Figure Legends

**Figure S1: Structural analysis of *A. oris* MdbA** – (A) Sequence alignment of actinobacterial MdbA and *B. subtilis*, *S. aureus*, and *M. tuberculosis* DsbA-like proteins was performed by ClustalW2. Conserved residues are highlighted. (B) Shown is the secondary structure of the MdbA protein based on the PDBSum server.  $\alpha$ -helices and  $\beta$ -strands are labeled as H1 - H7 and  $\beta$ 1 –  $\beta$ 5, respectively.  $3_{10}$  helices are not numbered. Structural motifs, i.e.  $\beta$ -turns, a  $\gamma$ -turn and  $\beta$ -hairpins, are marked as  $\beta$ ,  $\gamma$  and  $\beth$ , respectively. The active site CSHC motif is outlined in red, and the *cis*-Pro motif is in black. (C) The electrostatic surface potential of the *A.oris* MdbA and *E.coli* DsbA proteins is colored according to charge; red is negative and blue is positive. The active site cysteine residues are shown as (C). The hydrophobic groove, an area that MdbA interacts with its redox partner, i.e. DsbB in *E. coli* or MdbB/VKOR in actinobacteria, is indicated as arrows. The hydrophobic patch of *E.coli* DsbA, an area stabilizing interactions with polypeptide chains, is also highlighted.

## Supplemental Tables

**Supplemental Table S1:** Primers used in this study

| Primer                        | Sequence <sup>(a)</sup>                     | Used for                                                          |
|-------------------------------|---------------------------------------------|-------------------------------------------------------------------|
| FimA_F_C116A                  | GGTGTGCCGGACAGCGCCGCTGCCAACCCCG<br>GCCCCC   | pFimA <sub>C116A</sub>                                            |
| FimA_R_C116A                  | GGGGGCGGCGGGGTTGGCAGCGGCGCTGTC<br>GGCACACC  | pFimA <sub>C116A</sub>                                            |
| FimA_F_C157A                  | G TTCAGGCCTACCTCGTGGCTGAGACCACGAC<br>CCTGGT | pFimA <sub>C157A</sub>                                            |
| FimA_R_C157A                  | ACCAGGGGTCGTGGTCTCAGCCACGAGGTAG<br>CCTGAAC  | pFimA <sub>C157A</sub>                                            |
| FimA_F_C394A                  | AACGCCTACGCCAACACCGCTTCCAACGAGAA<br>GAGGGC  | pFimA <sub>C394A</sub>                                            |
| FimA_R_C394A                  | GCCCTCCTTCTCGTTGGAAGCGGTGTTGGCGT<br>GGCGTT  | pFimA <sub>C394A</sub>                                            |
| FimA_F_C445A                  | GTGAATGCCATGGAGCGCGCTTACGTCCTGGT<br>GAGACC  | pFimA <sub>C445A</sub>                                            |
| FimA_R_C445A                  | GGTCTCAACCAGGACGTAAGCGCGCTCCATGG<br>ATTCAC  | pFimA <sub>C445A</sub>                                            |
| VKOR_A_HindIII_F              | AAAAGCTTACTGCAACCTCGATGTCATCGCC             | pCWU2-VKOR                                                        |
| VKOR_B_R                      | GAAGAGCCTGGCCAGATCTGTGGGCATGCGC<br>ACAT     | pCWU2-VKOR                                                        |
| VKOR_C_F                      | CGCATGCCACAGATCTGGCCAGGCTCTTCGG<br>TGA      | pCWU2-VKOR                                                        |
| VKOR_D_XbaI_R                 | AATCTAGACGTCGGTGTGCGGCTCAATGG               | pCWU2-VKOR                                                        |
| VKOR_F_NdeI                   | AACATATGACGCCTCGGTAACGGTGG                  | pVKOR                                                             |
| VKOR_R_XbaI                   | AATCTAGATTCTTGGGCGCAGTCACC                  | pVKOR                                                             |
| mdbA <sub>Ao</sub> _F_XbaI    | AATCTAGACCACCCATCGGCCATCCATCATG             | pAraC-MdbA <sub>Ao</sub>                                          |
| mdbA <sub>Ao</sub> _F_ATG     | ATGGTTCGTCGCTCGTCA                          | pAraC-MdbA <sub>Ao</sub>                                          |
| araC_F_KpnI                   | AAGGTACCCTACTGTTTCTCCATACCCGTTT             | pAraC-MdbA <sub>Ao</sub>                                          |
| araC_R                        | TACCAATTATGACAACCTTGAC                      | pAraC-MdbA <sub>Ao</sub>                                          |
| MdbA <sub>Ao</sub> _F_XbaI    | AATCTAGACCACCCATCGGCCATCCATCATG             | pMdbA <sub>Ao</sub>                                               |
| MdbA <sub>Ao</sub> _R_EcoRI   | AAGAATTCTCAGCCTTGCTGAGTCGGCTGAGG            | pMdbA <sub>Ao</sub>                                               |
| MdbA <sub>Ao</sub> _C216A_F   | GCCTCTCACTGCGCCCAGTTTCGAG                   | pMdbA <sub>Ao</sub> C216A;<br>pMCSG7-MdbA <sub>Ao</sub>           |
| MdbA <sub>Ao</sub> _C216A_R   | GGAGTAGTCGAAGTAGATGTCGAGAACGGG              | C216A<br>pMdbA <sub>Ao</sub> C216A;<br>pMCSG7- MdbA <sub>Ao</sub> |
| MdbA <sub>Cd</sub> _BamHI_F   | AAAGGATCCCGCCTTCGCACGGTTCTTCAT              | C216A<br>pMdbA <sub>Cd</sub>                                      |
| MdbA <sub>Cd</sub> _BamHI_R   | AAAGGATCCTTAGTGATGGTG                       | pMdbA <sub>Cd</sub>                                               |
| Lic_MdbA <sub>Ao</sub> _DAK_F | TACTTCCAATCCAATGCAGACGCCAAGAAGAAC<br>CCA    | pMCSG7- MdbA <sub>Ao</sub>                                        |
| Lic_MdbA <sub>Ao</sub> _VQG_R | TTATCCACTTCCAATGTCAGCCTTGCTGAGTCG<br>C      | pMCSG7-MdbA <sub>Ao</sub>                                         |

|                                  |                                             |                                      |
|----------------------------------|---------------------------------------------|--------------------------------------|
| Lic_MdbA <sub>Cd</sub><br>_ANK_F | TACTTCCAATCCAATGCAGTGCAGGGCAAAGCAC<br>AC    | pMCSG7- MdbA <sub>Cd</sub>           |
| Lic_MdbA <sub>Cd</sub><br>_ATS_R | TTATCCACTTCCAATGTTAAGAGGTTGCTTGCTCA<br>ACCC | pMCSG7- MdbA <sub>Cd</sub>           |
| MdbA <sub>Cd</sub> _C91A_F       | TCGGCACCACATTGCGCCGAGCTTGGC                 | pMCSG7- MdbA <sub>Cd</sub> -<br>C91A |
| MdbA <sub>Cd</sub> _C91A_R       | GAAGTCCTCGTAGAAGTCGATCTTCTT                 | pMCSG7-MdbA <sub>Cd</sub> -<br>C91A  |

---

<sup>(a)</sup> Underlined are the restriction sites in the primers.

**Supplemental Table S2: Bacterial strains and plasmids used in this study**

| Strain & Plasmid           | Genotype and description                                                                    | Reference  |
|----------------------------|---------------------------------------------------------------------------------------------|------------|
| <i>Strain</i>              |                                                                                             |            |
| <i>A. oris</i> MG-1        | Parental Strain                                                                             | (1)        |
| <i>A. oris</i> CW1         | $\Delta galK$ ; an isogenic derivative of MG1                                               | (1)        |
| <i>A. oris</i> AR4         | $\Delta fimA$ ; an isogenic derivative of CW1                                               | (2)        |
| <i>A. oris</i> MR108       | $\Delta vkor$ ; an isogenic derivative of CW1                                               | This study |
| <i>A. oris</i> MR111       | MR108 containing pMdbA <sub>Ao</sub>                                                        | This study |
| <i>S. oralis</i> So34      | RPS-positive                                                                                | (3)        |
| <i>S. oralis</i> OC1       | RPS-negative                                                                                | (3)        |
| <i>Plasmid</i>             |                                                                                             |            |
| pJRD215                    | <i>Actinomyces/E. coli</i> shuttle vector, Kan <sup>R</sup>                                 | (4)        |
| pFimB                      | pJRD215 containing the <i>fimB</i> promoter                                                 | (2)        |
| pJRD508FimB                | pJRD215 containing the <i>fimB</i> promoter                                                 | (2)        |
| pFimA                      | pJRD215 expressing wild-type <i>fimA</i> under control of the <i>fimB</i> promoter          | (2)        |
| pFimA-C116A                | Derivative of pFimA harboring a C116A mutation                                              | This study |
| pFimA-C157A                | Derivative of pFimA harboring a C157A mutation                                              | This study |
| pFimA-C394A                | Derivative of pFimA harboring a C394A mutation                                              | This study |
| pFimA-C445A                | Derivative of pFimA harboring a C445A mutation                                              | This study |
| pVKOR                      | pJRD215 expressing wild-type <i>vkor</i>                                                    | This study |
| pMdbA <sub>Ao</sub>        | pJRD215 expressing <i>A. oris</i> wild-type <i>mdbA</i>                                     | This study |
| pAraC-MdbA <sub>Ao</sub>   | pJRD215 expressing <i>A. oris mdbA</i> under the control of an arabinose-inducible promoter | This study |
| pJRD-MdbA <sub>Cd</sub>    | pJRD215 expressing <i>C. diphtheriae</i> wild-type <i>mdbA</i>                              | This study |
| pMdbA <sub>Ao</sub> -C136A | pJRD215 expressing <i>mdbA<sub>Ao</sub></i> C136A                                           | This study |
| pCWU2                      | Integrative plasmid expressing gGalK under the control of the <i>rpsJ</i> promoter          | (2)        |
| pCWU2-VKOR                 | pCWU2 allelic replacement of <i>vkor</i>                                                    | This study |
| pMCSG7                     | Ligation-independent cloning for protein expression                                         | (5)        |
| pMCSG7-FimA                | For recombinant FimA expression                                                             | (2)        |
| pMCSG7-MdbA <sub>Ao</sub>  | For expression of recombinant MdbA <sub>Ao</sub>                                            | This study |

|                                    |                                                                               |            |
|------------------------------------|-------------------------------------------------------------------------------|------------|
| pMCSG7-MdbA <sub>A0</sub><br>C216A | For expression of recombinant MdbA <sub>A0</sub><br>harboring a AxxC mutation | This study |
| pMCSG7-MdbA <sub>Cd</sub>          | For expression of recombinant MdbA <sub>Cd</sub>                              | This study |
| pMCSG7-MdbA <sub>Cd C91A</sub>     | For expression of recombinant MdbA <sub>Cd</sub> harboring a<br>AxxC mutation | This study |

---

## Supplemental References

1. Mishra, A., Das, A., Cisar, J. O., and Ton-That, H. (2007) Sortase-catalyzed assembly of distinct heteromeric fimbriae in *Actinomyces naeslundii*. *J Bacteriol* **189**, 3156-3165
2. Mishra, A., Wu, C., Yang, J., Cisar, J. O., Das, A., and Ton-That, H. (2010) The *Actinomyces oris* type 2 fimbrial shaft FimA mediates co-aggregation with oral streptococci, adherence to red blood cells and biofilm development. *Mol Microbiol* **77** 841–854
3. Yoshida, Y., Ganguly, S., Bush, C. A., and Cisar, J. O. (2006) Molecular basis of L-rhamnose branch formation in streptococcal coaggregation receptor polysaccharides. *J Bacteriol* **188**, 4125-4130
4. Yeung, M. K., and Kozelsky, C. S. (1994) Transformation of *Actinomyces* spp. by a gram-negative broad-host-range plasmid. *J Bacteriol* **176**, 4173-4176
5. Stols, L., Gu, M., Dieckman, L., Raffin, R., Collart, F. R., and Donnelly, M. I. (2002) A new vector for high-throughput, ligation-independent cloning encoding a tobacco etch virus protease cleavage site. *Protein Expr Purif* **25**, 8-15

**A**

```

E. coli -----MKKIWLAL-----AGLVAFSASAA-----Q
A. oris  MVVRSSPHHKEHRVSSNQPRQTKAQRREAARLKAKELREAEARRARNTIARRSFIGAAG---ASVVGGLGYLVYLGVDAKKNPKSSK
S. aureus -----MTKKLLTLFIVSML---ILT---A---
B. subtilis -----MKKKQSS-----AK-----FAVILTVVVVLLAAIV---IINNKT-TE---
C. diphtheriae -----MSKNAG-S-----RKI---QNPT-----KSNGLFWALL--ALLVV-VVAVVTVVVVQGK-AHQANK
M. tuberculosis -----MADKSKRP-----PRF---DLKSAD-----GSFGRLVQIGGTTIVVVFVAVLVFYIVT-SR-DDKKDG

```

```

E. coli ---YEDG-----KQYTTLEKPVAGAPQVLEFFSFCPHCYQFEVLHISDNVKKKLEPG-VKMTKYHVN
A. oris  FPAPEGLATAKANQGGIPKQVLSASWYEGEALDTVAASAPVLDIYFDYSCSHCQAFEGLHTQEINQ--LLSDKKITLALHPCKL
S. aureus ---CGKKE---SATTS-----SKNGKPLVVIYGDYKCPYCKELDEKVMPLRKN-YIDNHKVEYQFVNLA
B. subtilis ---QGND---VSGQPSIK-----GQPVLGKDDAPVTVEFGDYKCPSCKVFNSDIFPKIQKD-FIDKGDVVKFSFVNMF
C. diphtheriae YADYDKES---VSFTGSVTD-----AIVLKAVNAKDAKKIDFYEDFSCPHCAELGEVTDGPMTK--AIENGDIVVNLRLNF
M. tuberculosis VAGPG-DA---V---RVTSS-----K-LVTQPGTSNPKAVVSFYEDLCPACGIFERGFPGTVSK--LVDIGAVAADYTMVAI

```

```

E. coli  MGGDLGKDLTQAWAVMALLGVEDK-----VTVPLEGVQKTK-----TIRSASDIRDVFINAGIKG
A. oris  LQQE-----WTSVVMNAMGVVLDEAPAQSLSFHNAAFEIFSQAIQTKNQSNMTVEGLVAAA-----AKVNVPKVESAK-FKAAVDS
S. aureus LGKDSIVG-----SRASHAVLMYAPKSFLDFQKQLFAAQDEN-----KEWLTKELLDKH-----IKQLHLDKETENKIKDYKTK
B. subtilis HGKGSRLA-----ALASEEVWKEDPDSFDFHEKLEKQPDTE-----QEWVTPGLLGD-----AKSTTKIKPET---LKENLDK
C. diphtheriae LDRDGDG-NSTKAGAAALAVAQSGDWETYWNYRALLMKEQNIY-----GKWGDNDFADVA-----KSLGASDEVTQK-IREGGAK
M. tuberculosis LDSASNQH-YSSRAAAAAYCVADE-SIEAFRRFHAALSKDI--Q-----PAELGKDFPDNARLIELAREAGVVGKVPDC-INSGYI

```

```

E. coli  EEDAAWNSFVVKSLVAQQEKAAADVQLRGVFAMVNGKYQLNPQGMDSNMDV--FVQ-QYADTVKYLSEKK-----
A. oris  DKYG-KW-----VKLGDEAFKARELEGTPTVFFKGEKVDLNLK--QTPTSLTELVT---GSTPTAQSPQPTQQG
S. aureus DSKSWKA-----AEKDKKIAKDNHIKTTPTAFINGEKVEDPYDYESYEKLLKDKIK-----
B. subtilis -ETFASQ-----VEKSDSLNQKMNIQATPTIYVNDKVIKNFADYDEIKETIEKELKGG-----
C. diphtheriae EDFRKFA-----EANSKLEKDGGSVSSPRVFDGKEVKNGIETWVEQATS-----
M. tuberculosis EKVDGLA-----AA-----VNVHATTVRVNGTE-----YEWSTPAALVAKIKEIVGDVPGIDSAATATS-

```

**B**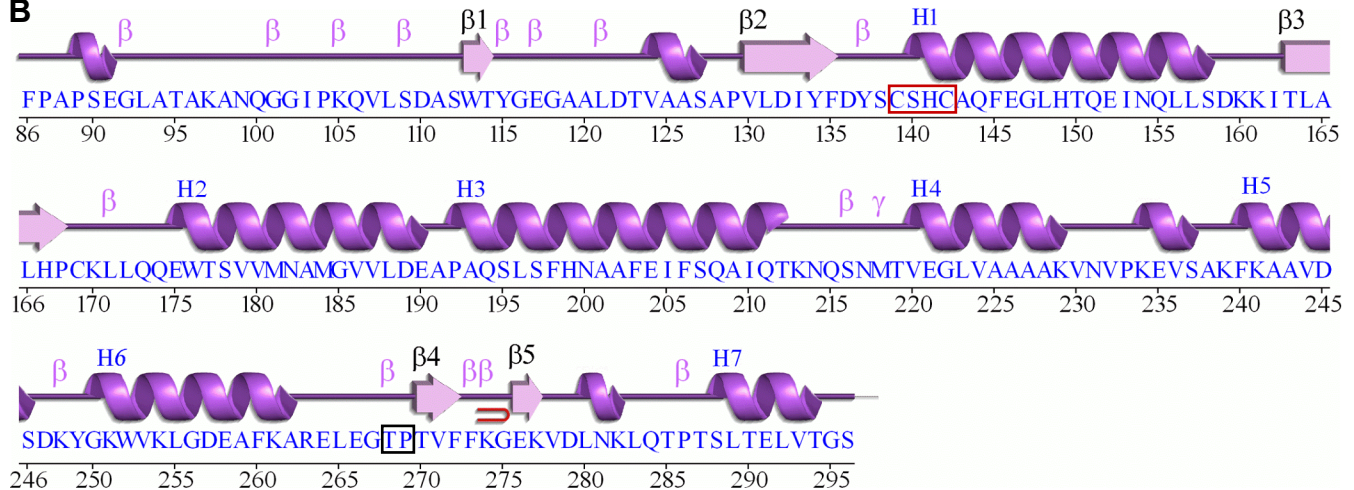**C**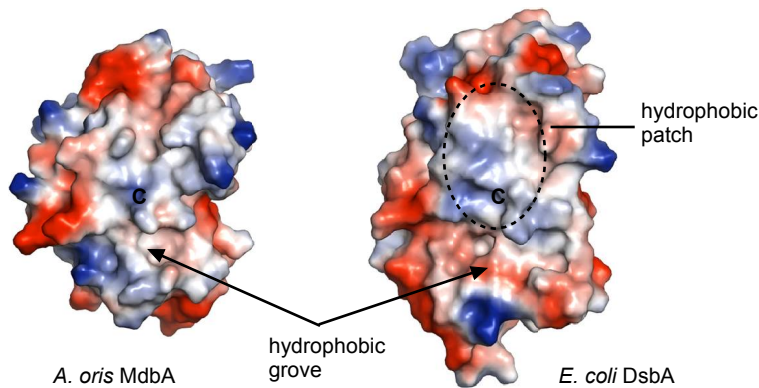

Figure S1: Reardon-Robinson et al.
